# Supplementary material
Source: publisher figshare collection journal article supplement (https://plos.figshare.com/articles/dataset/_/812554)
Supplement: Supplementary file 1 [file 1 › Table_S1.docx]

|  | Weeks | 0 | 3 | 6 | 9 | 12 | 24 |
| --- | --- | --- | --- | --- | --- | --- | --- |
| Serum Gastrin RIA (pmol/L) | Mean | 866.25 | 957.50 | 916.25 | 837.50 | 963.75 | 702.50 |
| SD | 385.87 | 356.68 | 366.77 | 318.62 | 509.85 | 159.12 |
| Range | 470-1750 | 540-1500 | 380-1550 | 490-1600 | 450-2000 | 500-970 |
| Serum Gastrin ELISA (pmol/L) | Mean | 554.81 | 617.63 | 537.38 | 574.63 | 613.15 | 518.31 |
| SD | 183.79 | 199.52 | 210.33 | 195.49 | 225.02 | 131.87 |
| Range | 331.5-953 | 365-890 | 211-896 | 335-904 | 293-953 | 367-742 |
| Plasma CgA (U/L) | Mean | 63.16 | 18.95 | 22.41 | 18.58 | 19.60 | 51.60 |
| SD | 31.04 | 9.90 | 18.17 | 10.93 | 11.96 | 22.64 |
| Range | 25.2-128 | 9.31-40.9 | 9.14-68.8 | 8.45-45.4 | 9.08-48.6 | 24.3-98 |
| Tumour number | Mean | 11.37 | - | 8.63 | - | 7.25 | 7.38 |
| SD | 7.36 | - | 5.22 | - | 3.49 | 4.06 |
| Range | 4-30 | - | 2-20 | - | 2-12 | 1-14 |
| Tumour size (mm) | Mean | 8 | - | 6.5 | - | 5.5 | 5.125 |
| SD | 3.46 | - | 3 | - | 2.96 | 3.26 |
| Range | 3-15 | - | 2-10 | - | 2-10 | 2-10 |
